# Supplementary material
Source: PubMed Central journal article supplement (PMC421720)
Supplement: cmaj_170_13_1925__1.pdf [file cmaj_170_13_1925__1.pdf]

**e-Table 1: Citation and author self-citation counts of publications about diabetes mellitus in 50 clinical journals**

| Journal                                 | No. of diabetes articles | Mean citation count per article | % of self-citations among all citations |
|-----------------------------------------|--------------------------|---------------------------------|-----------------------------------------|
| <i>Acta Obstet Gynecol Scand</i>        | 2                        | 2.5                             | 17                                      |
| <i>Age Ageing</i>                       | 1                        | 4                               | 25                                      |
| <i>Am J Cardiol</i>                     | 5                        | 3.6                             | 28                                      |
| <i>Am J Epidemiol</i>                   | 1                        | 7                               | 0                                       |
| <i>Am J Gastroenterol</i>               | 2                        | 2.5                             | 20                                      |
| <i>Am J Med</i>                         | 3                        | 6.7                             | 44                                      |
| <i>Am J Obstet Gynecol</i>              | 4                        | 4.5                             | 5                                       |
| <i>Am J Psychiatry</i>                  | 1                        | 99                              | 8                                       |
| <i>Am J Public Health</i>               | 1                        | 27                              | 33                                      |
| <i>Ann Intern Med</i>                   | 4                        | 27.3                            | 18                                      |
| <i>Arch Intern Med</i>                  | 10                       | 17.4                            | 18                                      |
| <i>Arch Med Res</i>                     | 1                        | 6                               | 67                                      |
| <i>Arch Surg</i>                        | 2                        | 11                              | 17                                      |
| <i>BMJ</i>                              | 8                        | 35.5                            | 17                                      |
| <i>Br J Obstet Gynaecol</i>             | 1                        | 3                               | 0                                       |
| <i>Br J Surg</i>                        | 1                        | 9                               | 22                                      |
| <i>Can J Surg</i>                       | 1                        | 1                               | 0                                       |
| <i>Circulation</i>                      | 5                        | 17.4                            | 7                                       |
| <i>Clin Invest Med</i>                  | 1                        | 0                               | –                                       |
| <i>Clin Pediatr</i>                     | 1                        | 6                               | 0                                       |
| <i>CMAJ</i>                             | 3                        | 5.3                             | 11.5                                    |
| <i>Crit Care Med</i>                    | 2                        | 2                               | 0                                       |
| <i>Diabetes Care</i>                    | 115                      | 8.2                             | 18                                      |
| <i>Diabet Med</i>                       | 40                       | 6.9                             | 17                                      |
| <i>Foot Ankle Int</i>                   | 3                        | 2.3                             | 0                                       |
| <i>Gastroenterology</i>                 | 2                        | 7.5                             | 21                                      |
| <i>Health Policy</i>                    | 1                        | 2                               | 0                                       |
| <i>Hypertension</i>                     | 4                        | 14.3                            | 19                                      |
| <i>Int J Technol Assess Health Care</i> | 1                        | 2                               | 0                                       |
| <i>J Am Coll Cardiol</i>                | 10                       | 15.7                            | 25                                      |
| <i>J Am Geriatr Soc</i>                 | 1                        | 4                               | 0                                       |
| <i>J Bone Joint Surg Am</i>             | 2                        | 2.5                             | 0                                       |
| <i>J Clin Epidemiol</i>                 | 3                        | 3                               | 13                                      |
| <i>J Epidemiol Community Health</i>     | 2                        | 8                               | 0                                       |
| <i>J Fam Pract</i>                      | 2                        | 2.5                             | 17                                      |
| <i>J Gen Intern Med</i>                 | 1                        | 5                               | 60                                      |
| <i>J Intern Med</i>                     | 9                        | 4.2                             | 37                                      |
| <i>J Pediatr</i>                        | 4                        | 11                              | 6                                       |
| <i>J Psychosom Res</i>                  | 1                        | 10                              | 20                                      |
| <i>JAMA</i>                             | 5                        | 37.6                            | 7                                       |
| <i>Lancet</i>                           | 2                        | 145.5                           | 2                                       |
| <i>Med Care</i>                         | 2                        | 15                              | 29                                      |
| <i>Med J Aust</i>                       | 1                        | 4                               | 25                                      |
| <i>N Engl J Med</i>                     | 8                        | 79                              | 10                                      |
| <i>Pediatrics</i>                       | 1                        | 5                               | 40                                      |
| <i>Plast Reconstr Surg</i>              | 3                        | 3                               | 28                                      |
| <i>Psychosom Med</i>                    | 1                        | 1                               | 0                                       |
| <i>Spine</i>                            | 1                        | 0                               | –                                       |
| <i>Stroke</i>                           | 1                        | 5                               | 0                                       |
| <i>West J Med</i>                       | 3                        | 2                               | 67                                      |
